# Supplementary material
Source: MDPI journal article supplement (https://www.mdpi.com/2073-4344/11/4/513)
Supplement: s1 [file s1]

# Supplementary Materials: Unconventional Gold-Catalyzed One-Pot/Multicomponent Synthesis of Propargylamines Starting from Benzyl Alcohols

Stephany Zárate-Roldán <sup>1,2</sup>, M. Concepción Gimeno <sup>2,\*</sup> and Raquel P. Herrera <sup>1,\*</sup>

<sup>1</sup> Laboratorio de Organocatálisis Asimétrica, Departamento de Química Orgánica, Instituto de Síntesis Química y Catálisis Homogénea (ISQCH) CSIC-Universidad de Zaragoza, C/ Pedro Cerbuna 12, 50009 Zaragoza, Spain; szarate.roldan@gmail.com

<sup>2</sup> Departamento de Química Inorgánica, Instituto de Síntesis Química y Catálisis Homogénea (ISQCH) CSIC-Universidad de Zaragoza, C/ Pedro Cerbuna 12, 50009 Zaragoza, Spain

\* Correspondence: gimeno@unizar.es (M.C.G.); raquelph@unizar.es (R.P.H.); Tel.: +34-976762291 (M.C.G.); +34-976761190 (R.P.H.)

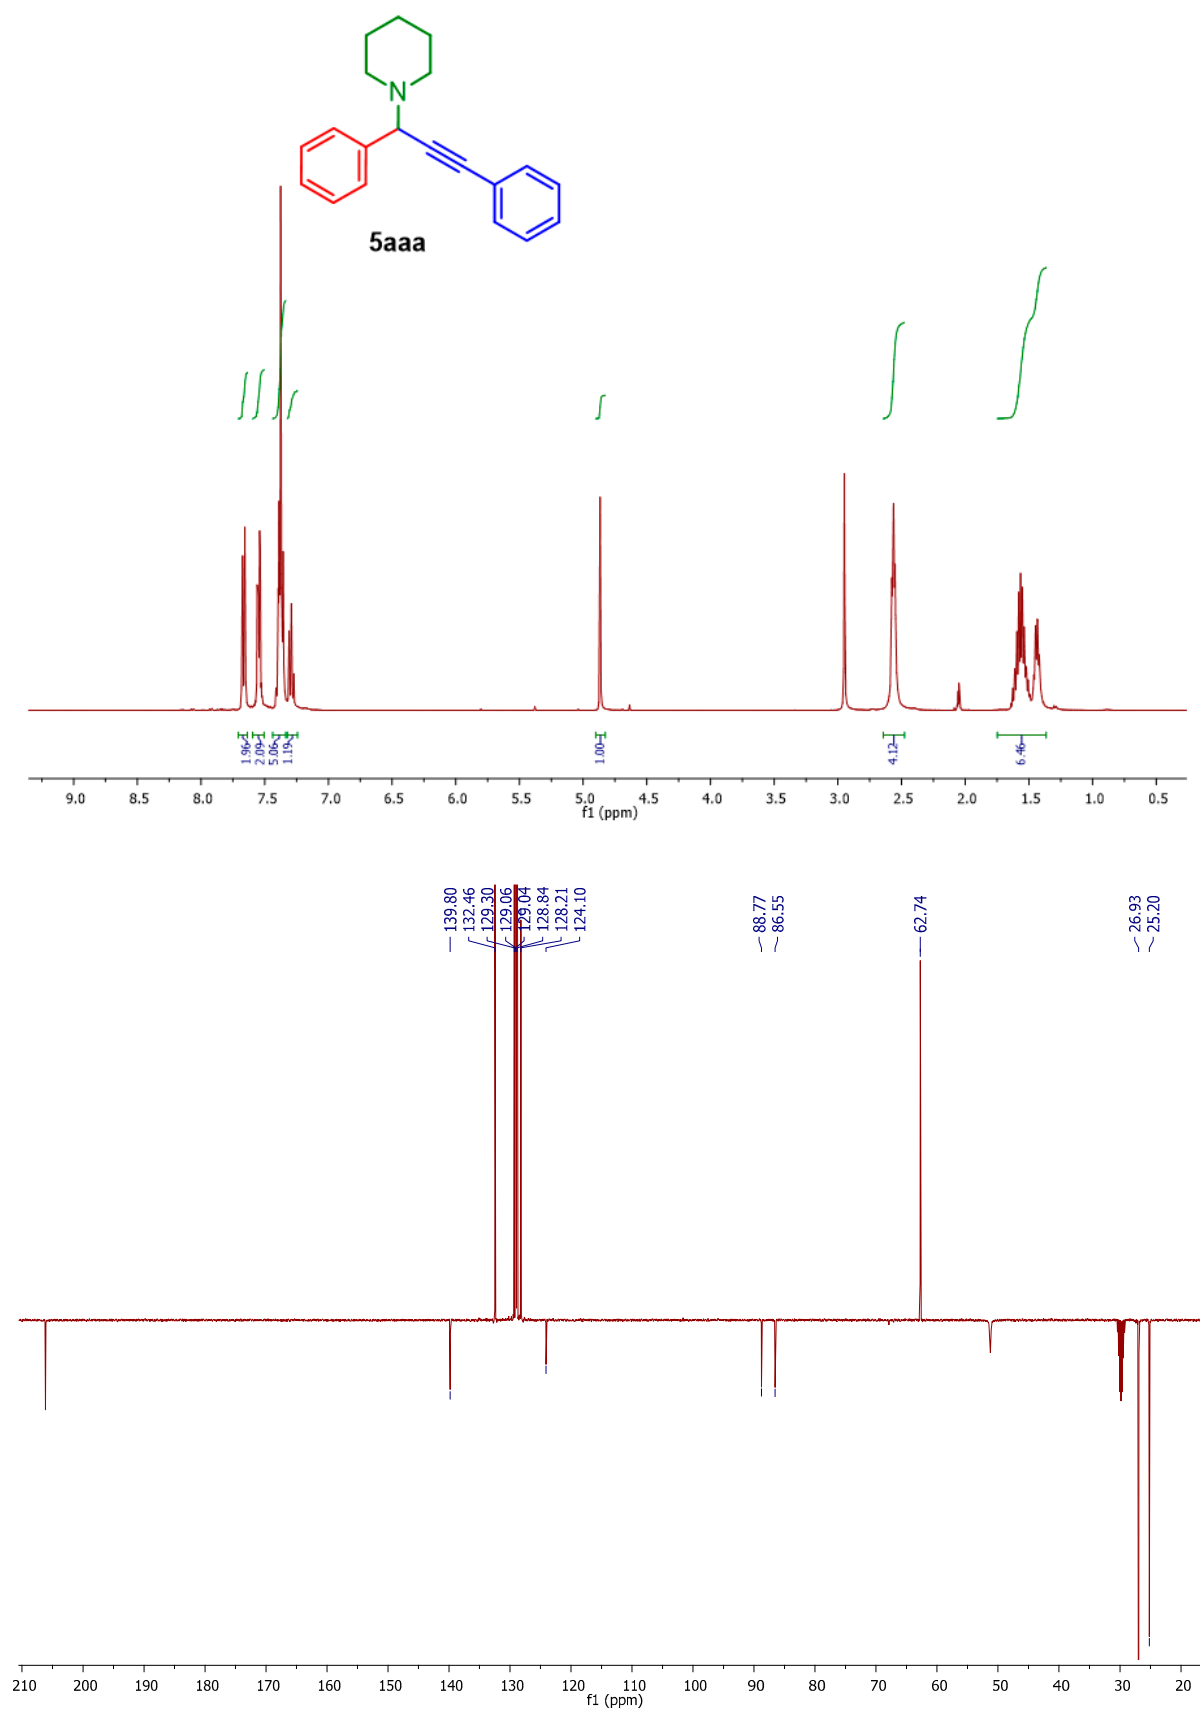

**Figure S1.**  $^1\text{H}$  and  $^{13}\text{C}$ -APT ( $\text{CD}_3\text{COCD}_3$ ) NMR spectra of 1-(1,3-diphenylprop-2-ynyl)piperidine (5aaa).

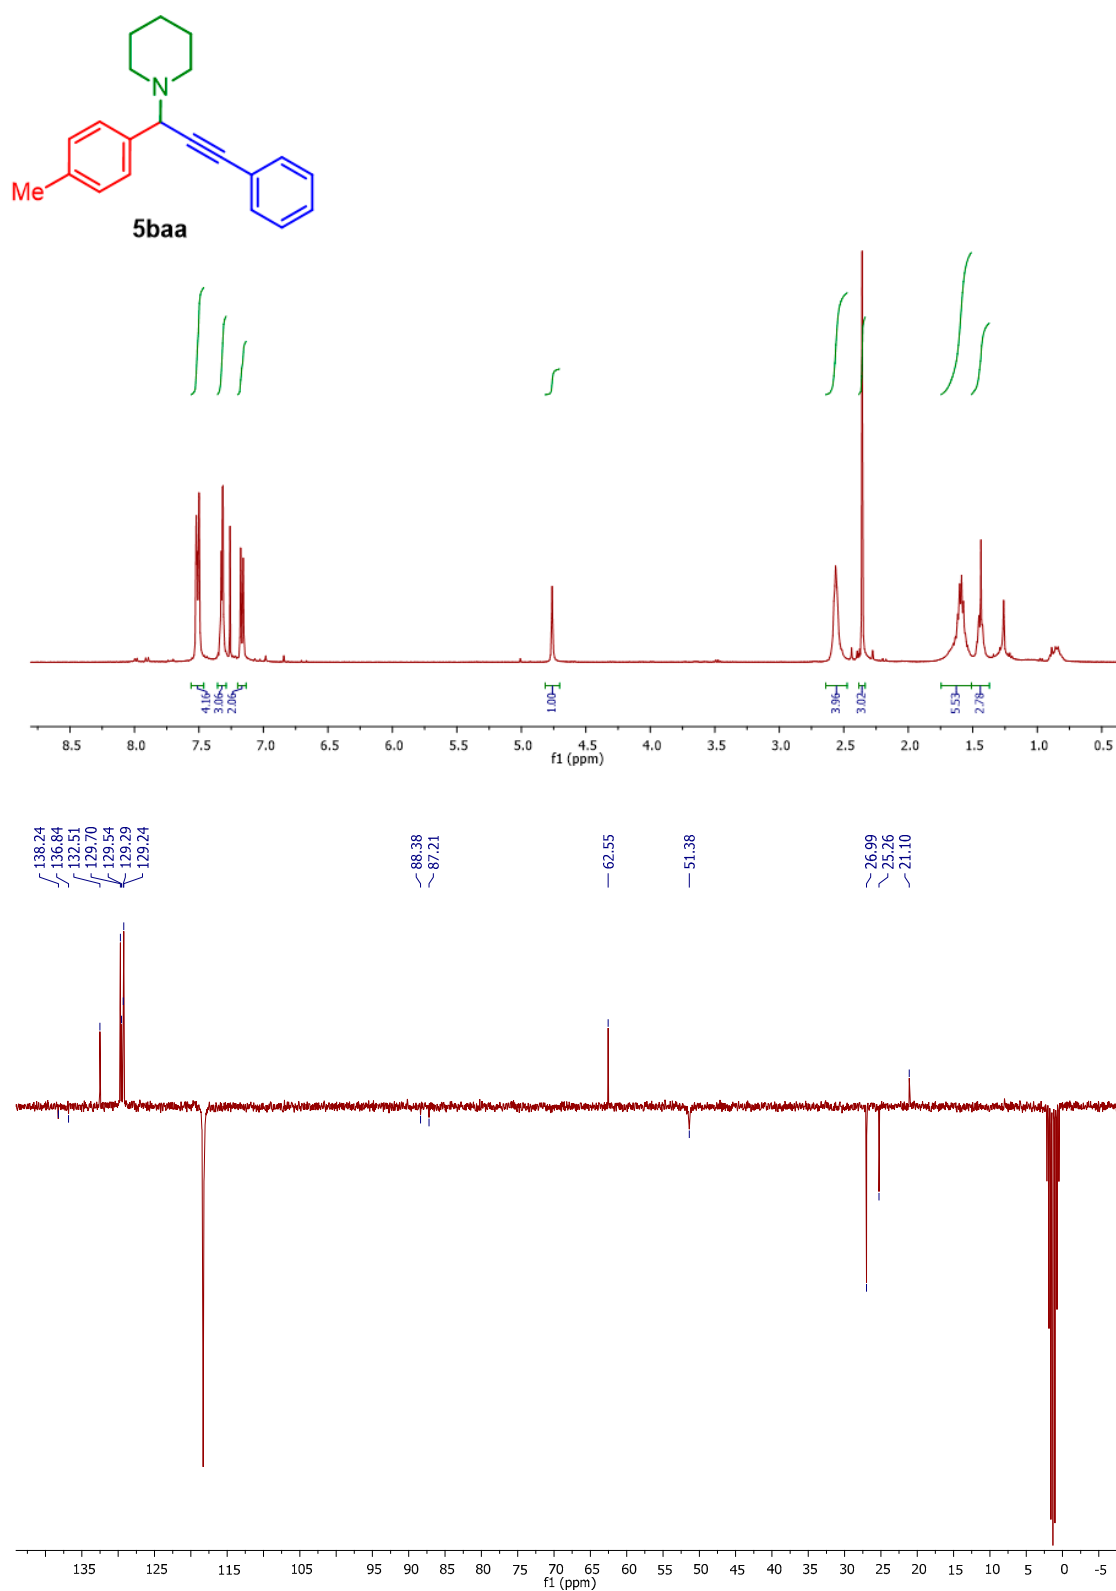

**Figure S2.** <sup>1</sup>H (CDCl<sub>3</sub>) and <sup>13</sup>C-APT (CD<sub>3</sub>CN) NMR spectra of 1-(3-phenyl-1-*p*-tolylprop-2-ynyl)piperidine (**5baa**).

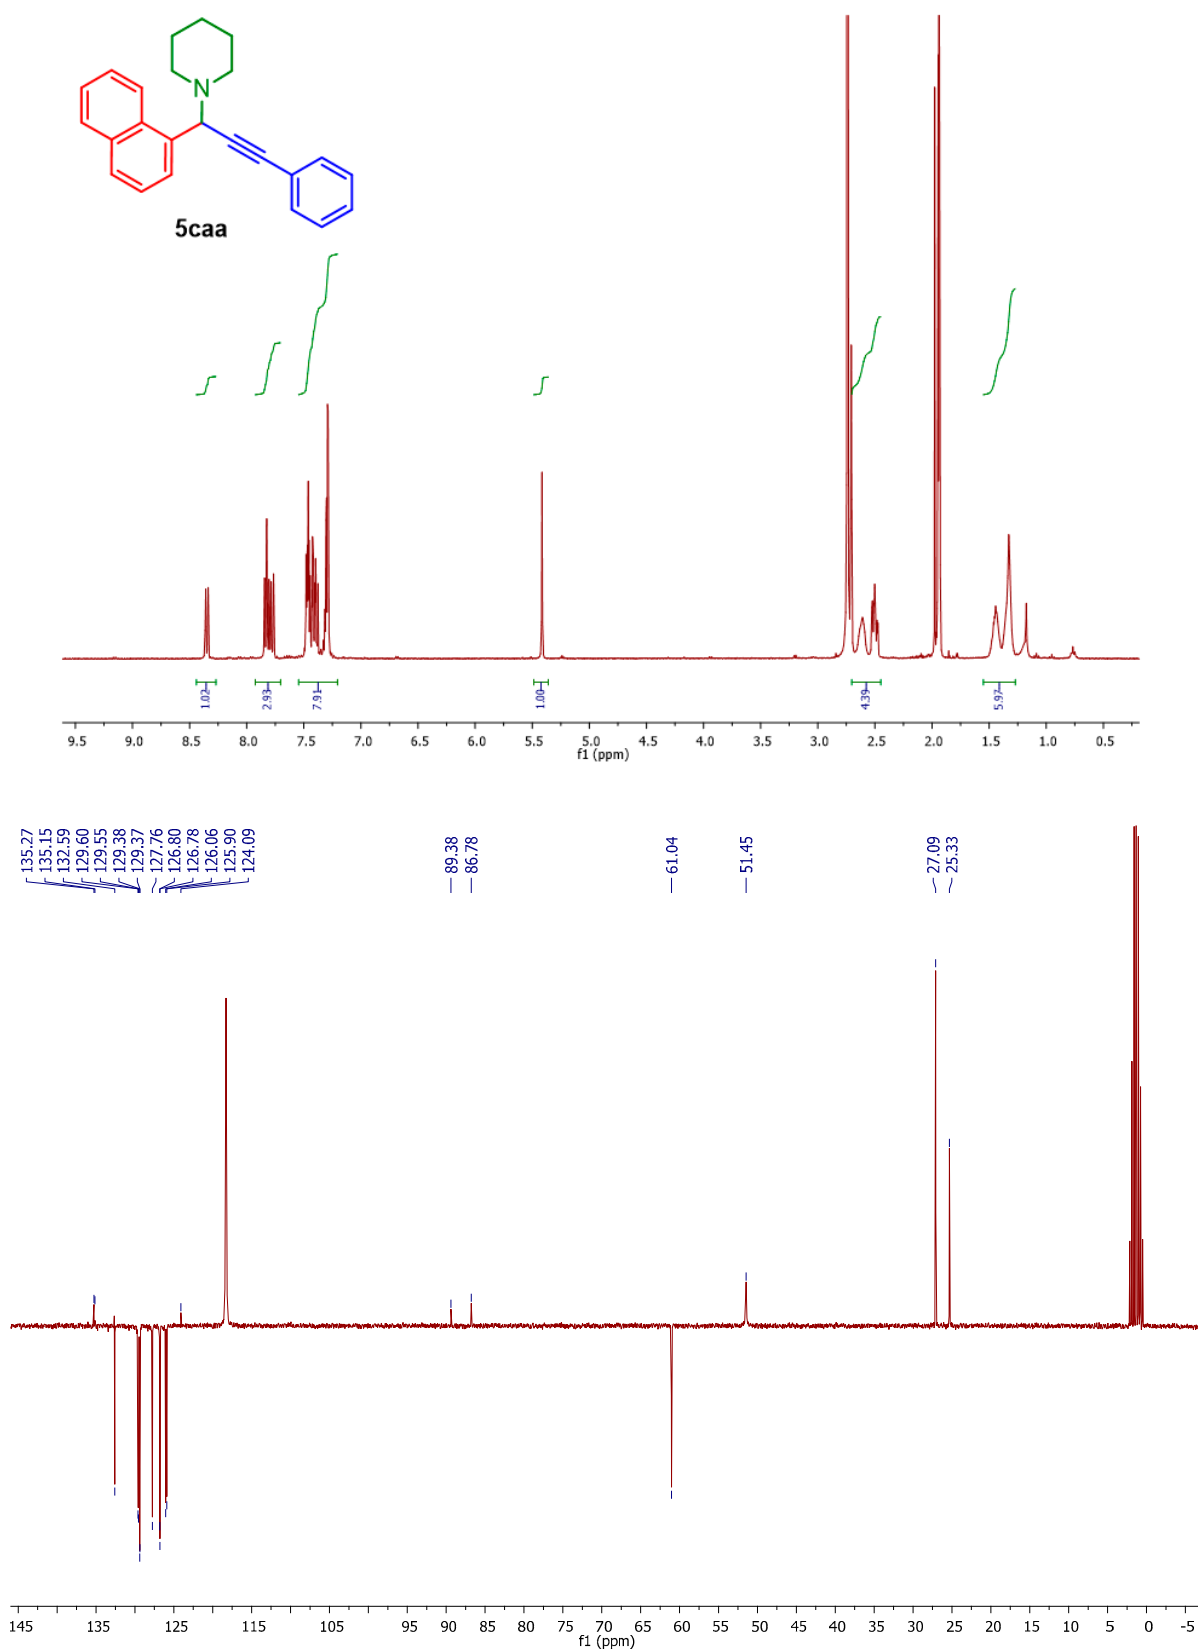

**Figure S3.** <sup>1</sup>H (CD<sub>3</sub>COCD<sub>3</sub>) and <sup>13</sup>C-APT (CD<sub>3</sub>CN) NMR spectra of 1-(1-(naphthalen-1-yl)-3-phenylprop-2-ynyl)piperidine (5caa).

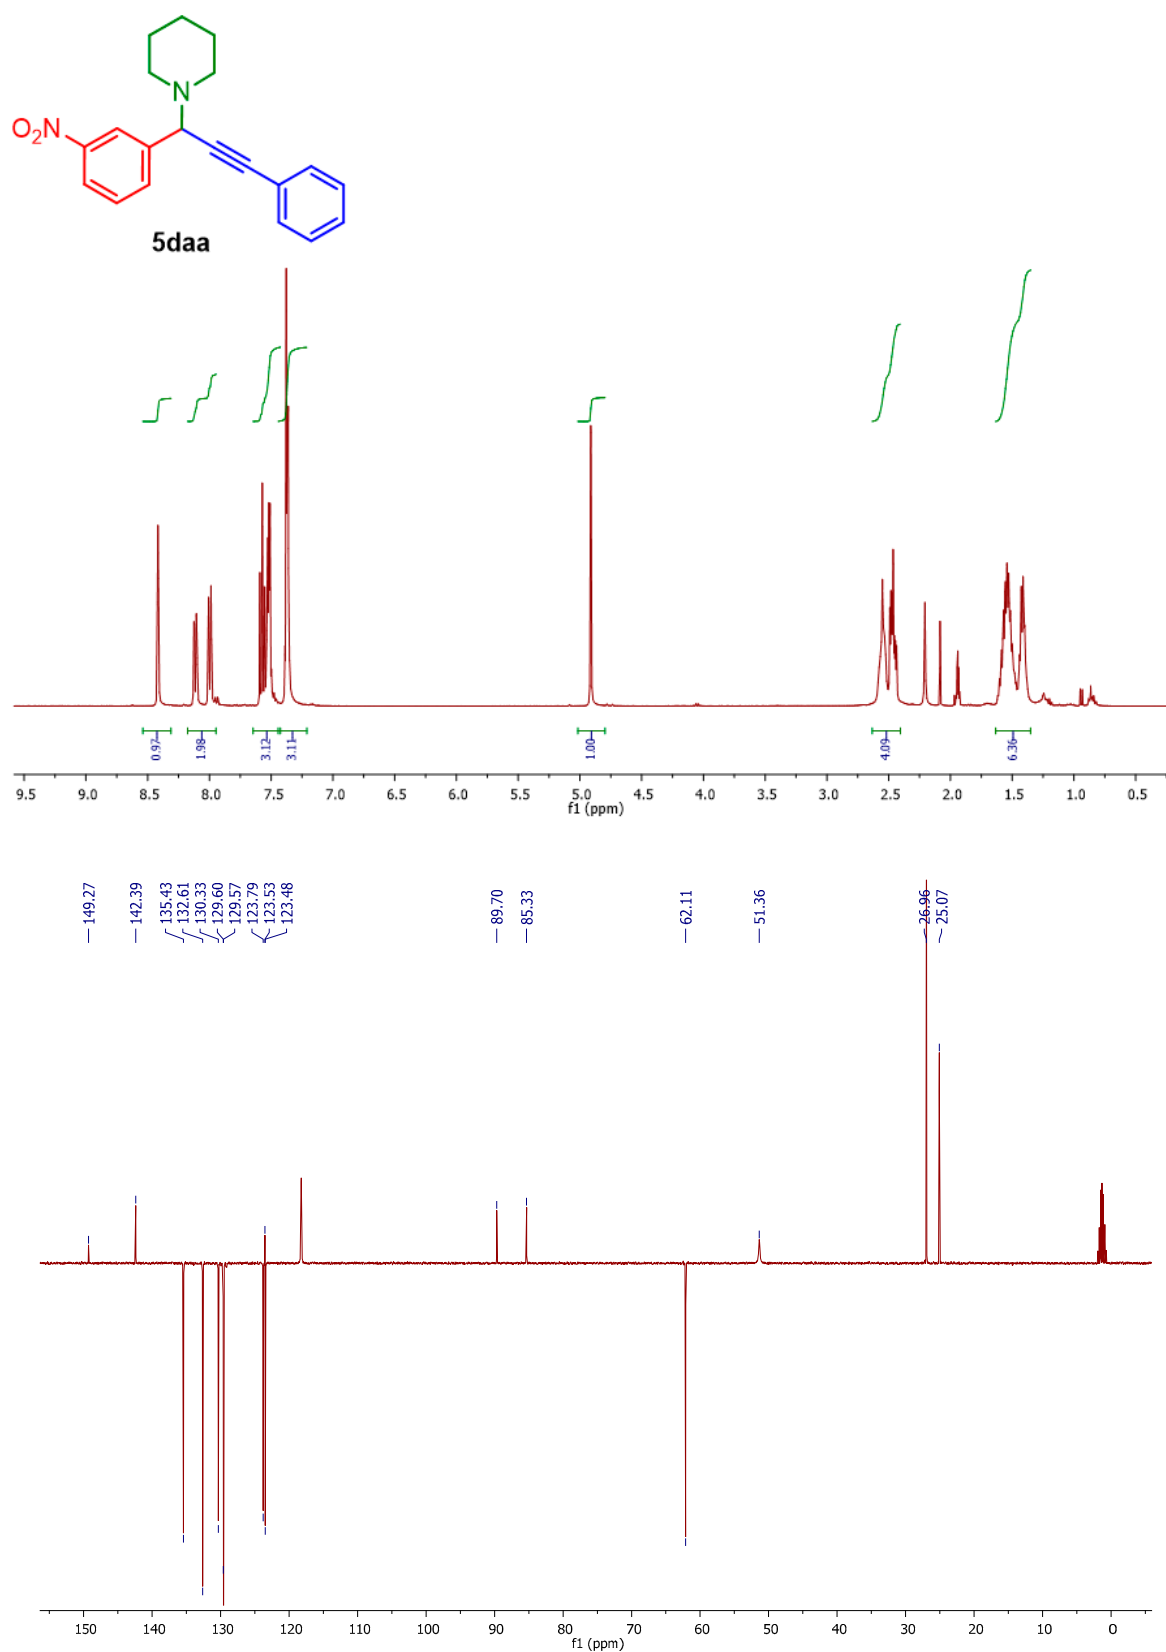

**Figure S4.**  $^1\text{H}$  and  $^{13}\text{C}$ -APT ( $\text{CD}_3\text{CN}$ ) NMR spectra of 1-(1-(3-nitrophenyl)-3-phenylprop-2-ynyl)piperidine (**5daa**).

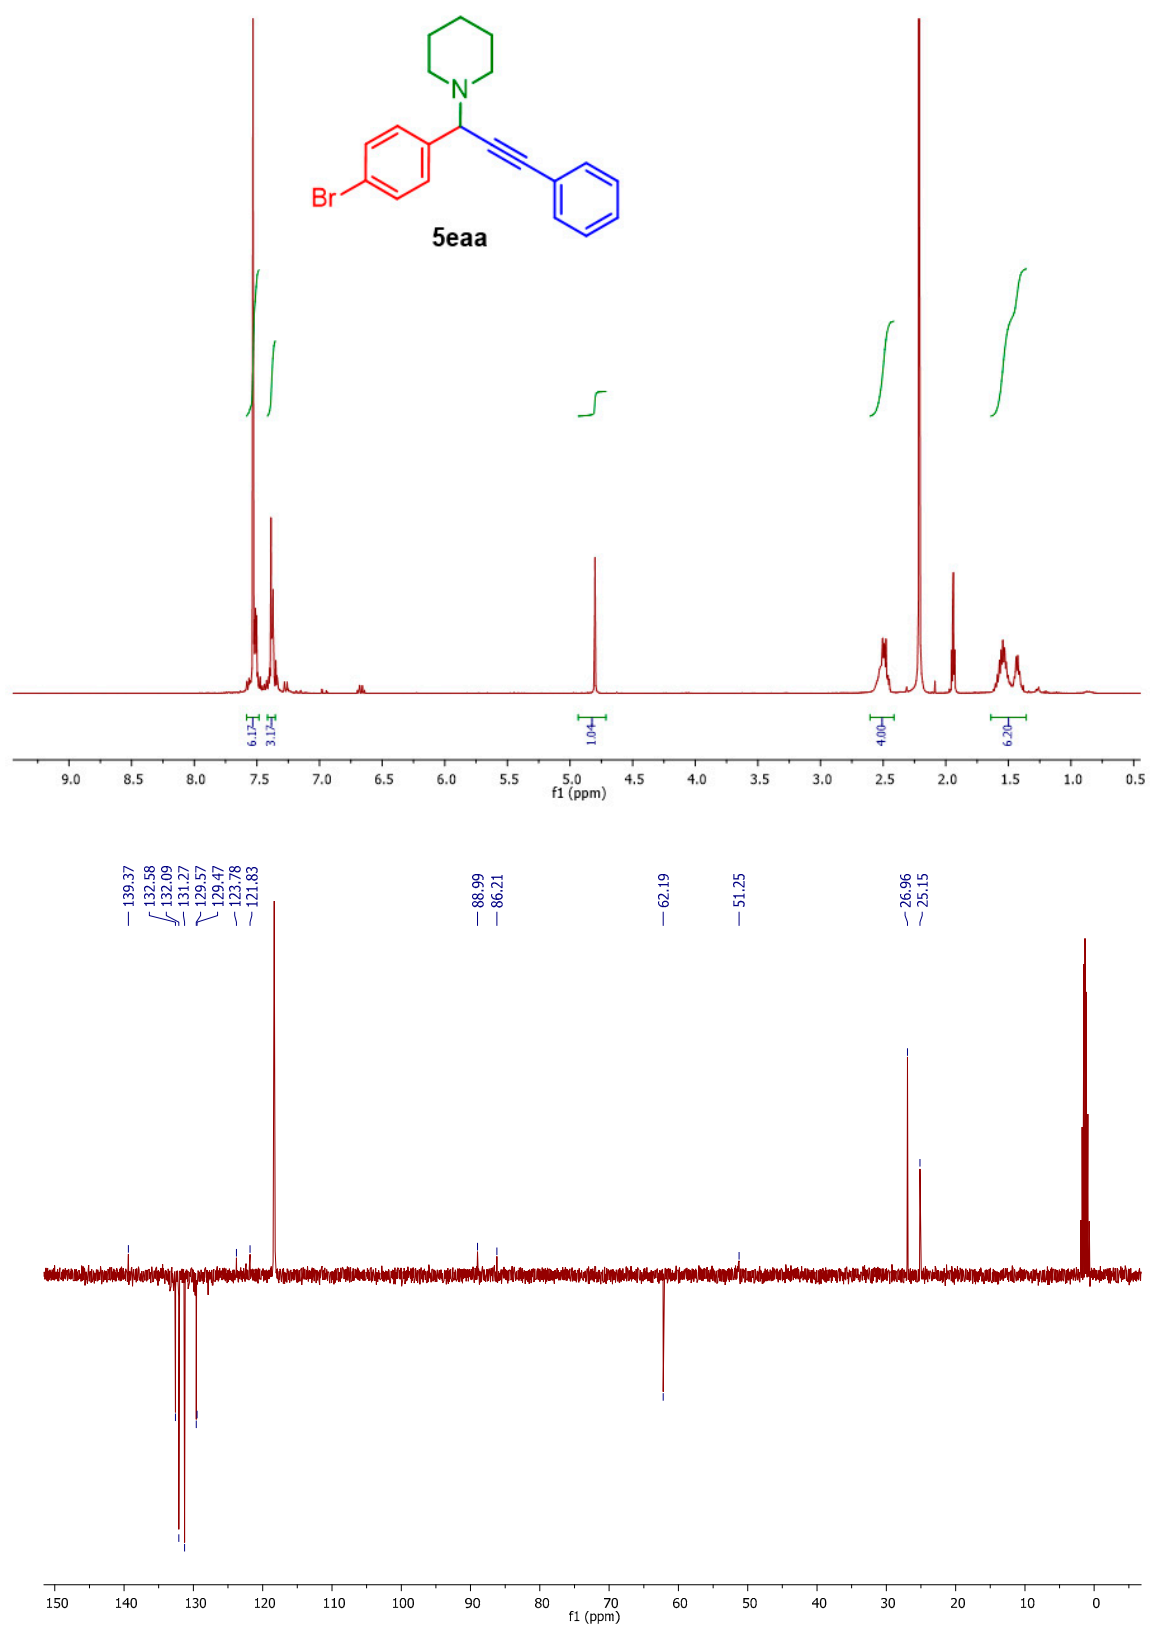

Figure S5.  $^1\text{H}$  and  $^{13}\text{C}$ -APT ( $\text{CD}_3\text{CN}$ ) NMR spectra of 1-(1-(4-bromophenyl)-3-phenylprop-2-ynyl)piperidine (5eaa).

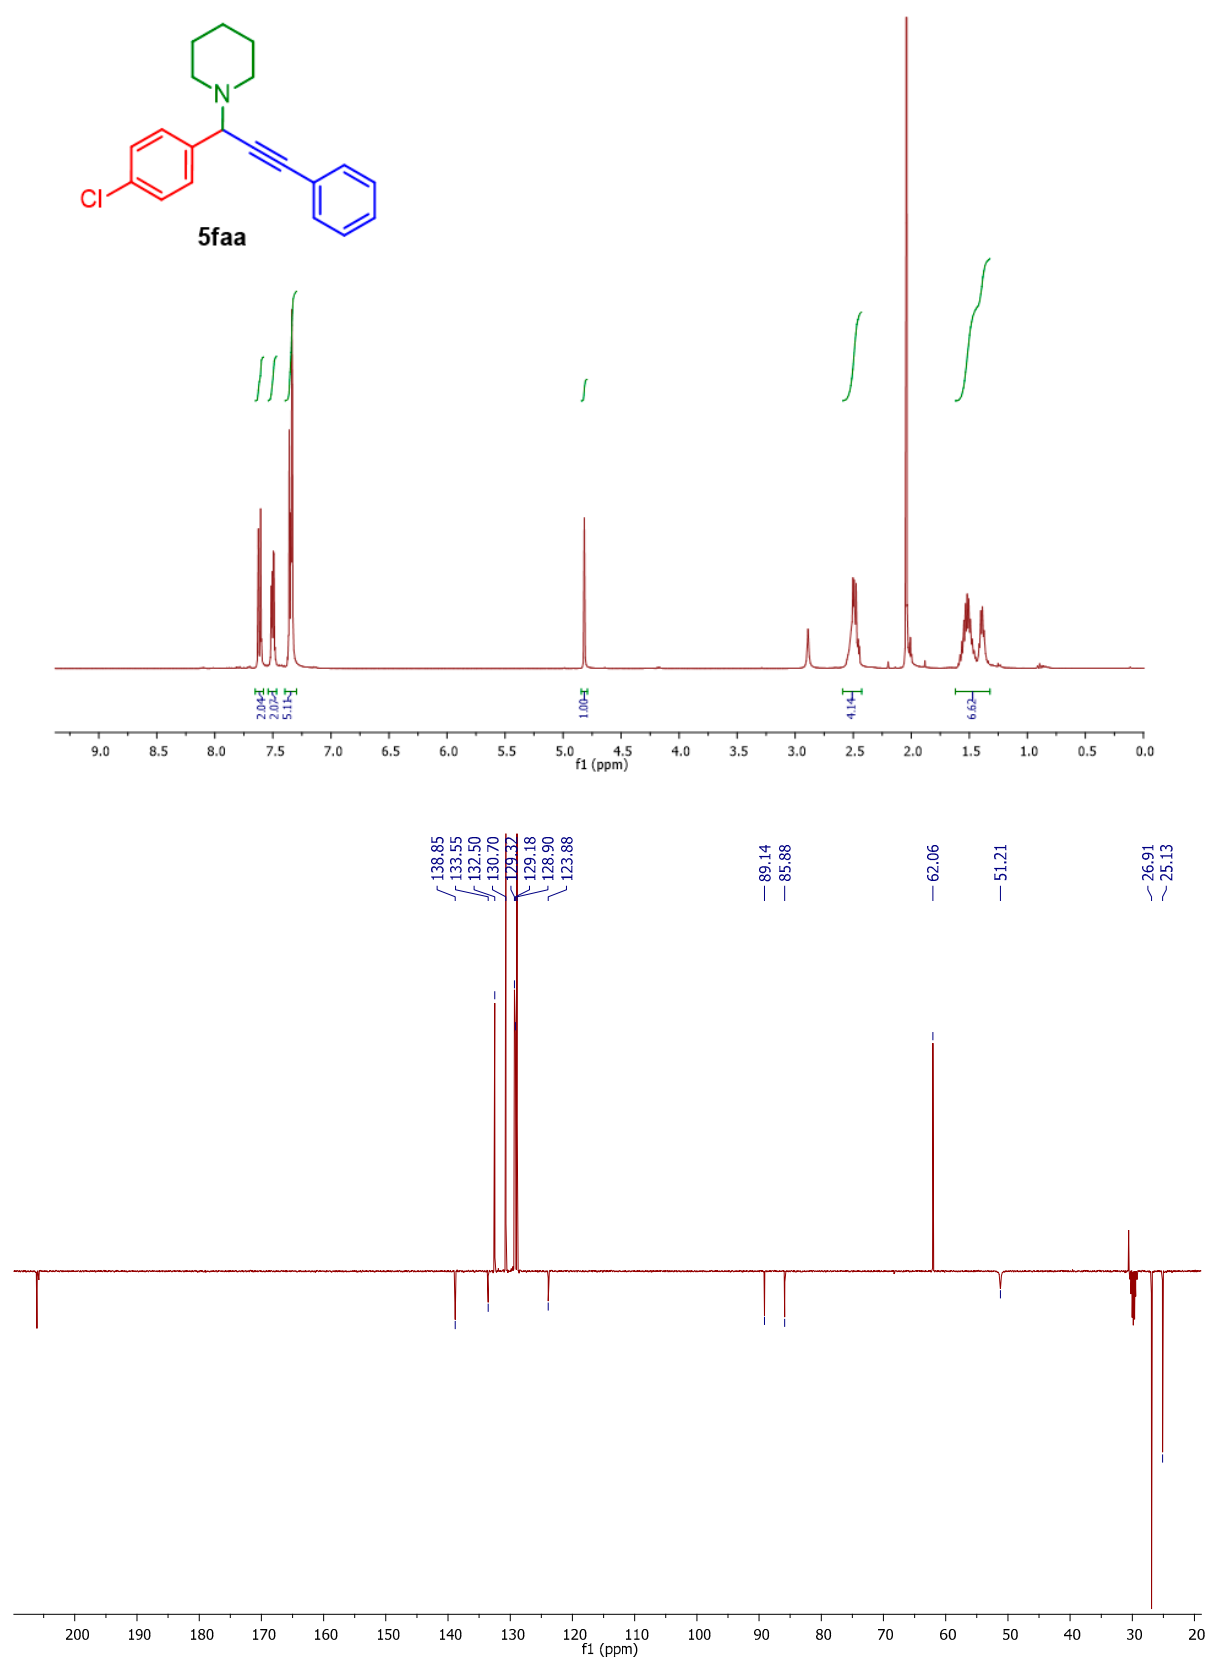

**Figure S6.**  $^1\text{H}$  and  $^{13}\text{C}$ -APT ( $\text{CD}_3\text{COCD}_3$ ) NMR spectra of 1-(1-(4-chlorophenyl)-3-phenylprop-2-ynyl)piperidine (**5faa**).

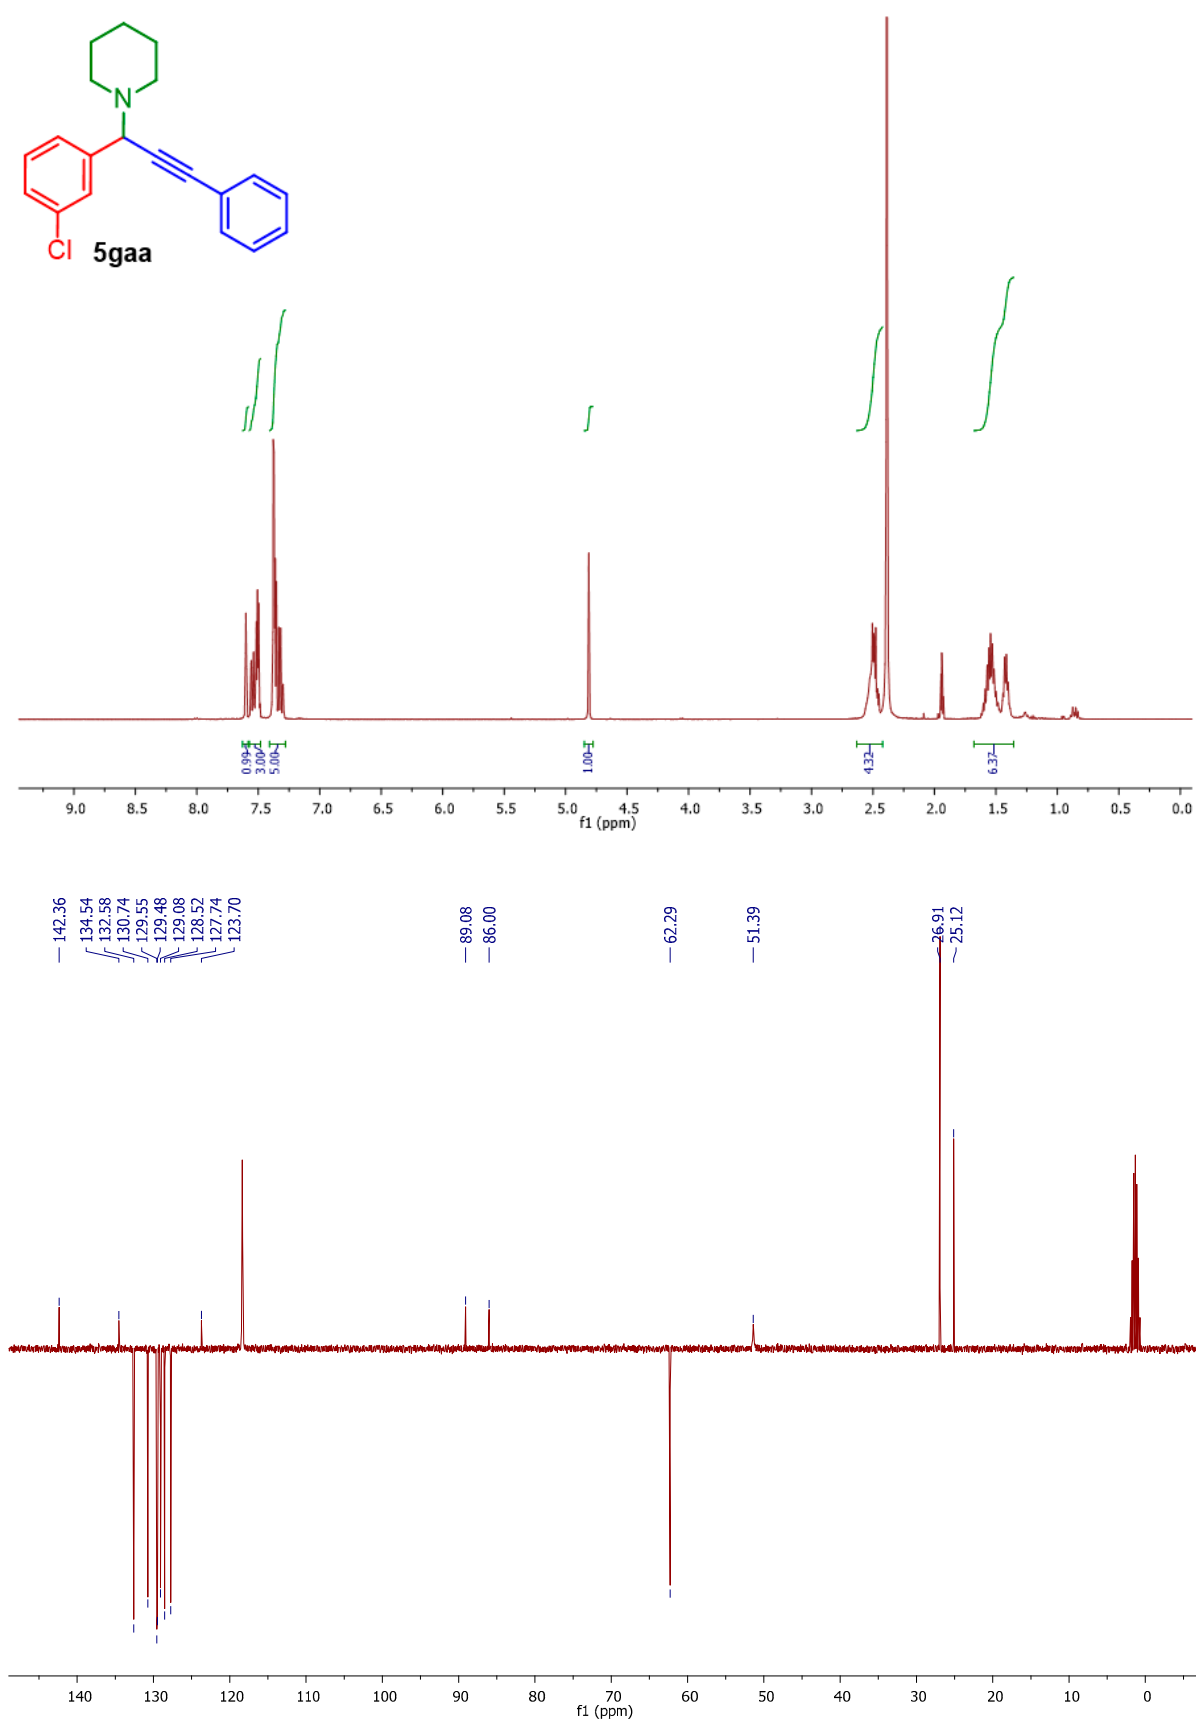

Figure S7.  $^1\text{H}$  and  $^{13}\text{C}$ -APT ( $\text{CD}_3\text{CN}$ ) NMR spectra of 1-(1-(3-chlorophenyl)-3-phenylprop-2-ynyl)piperidine (5gaa).



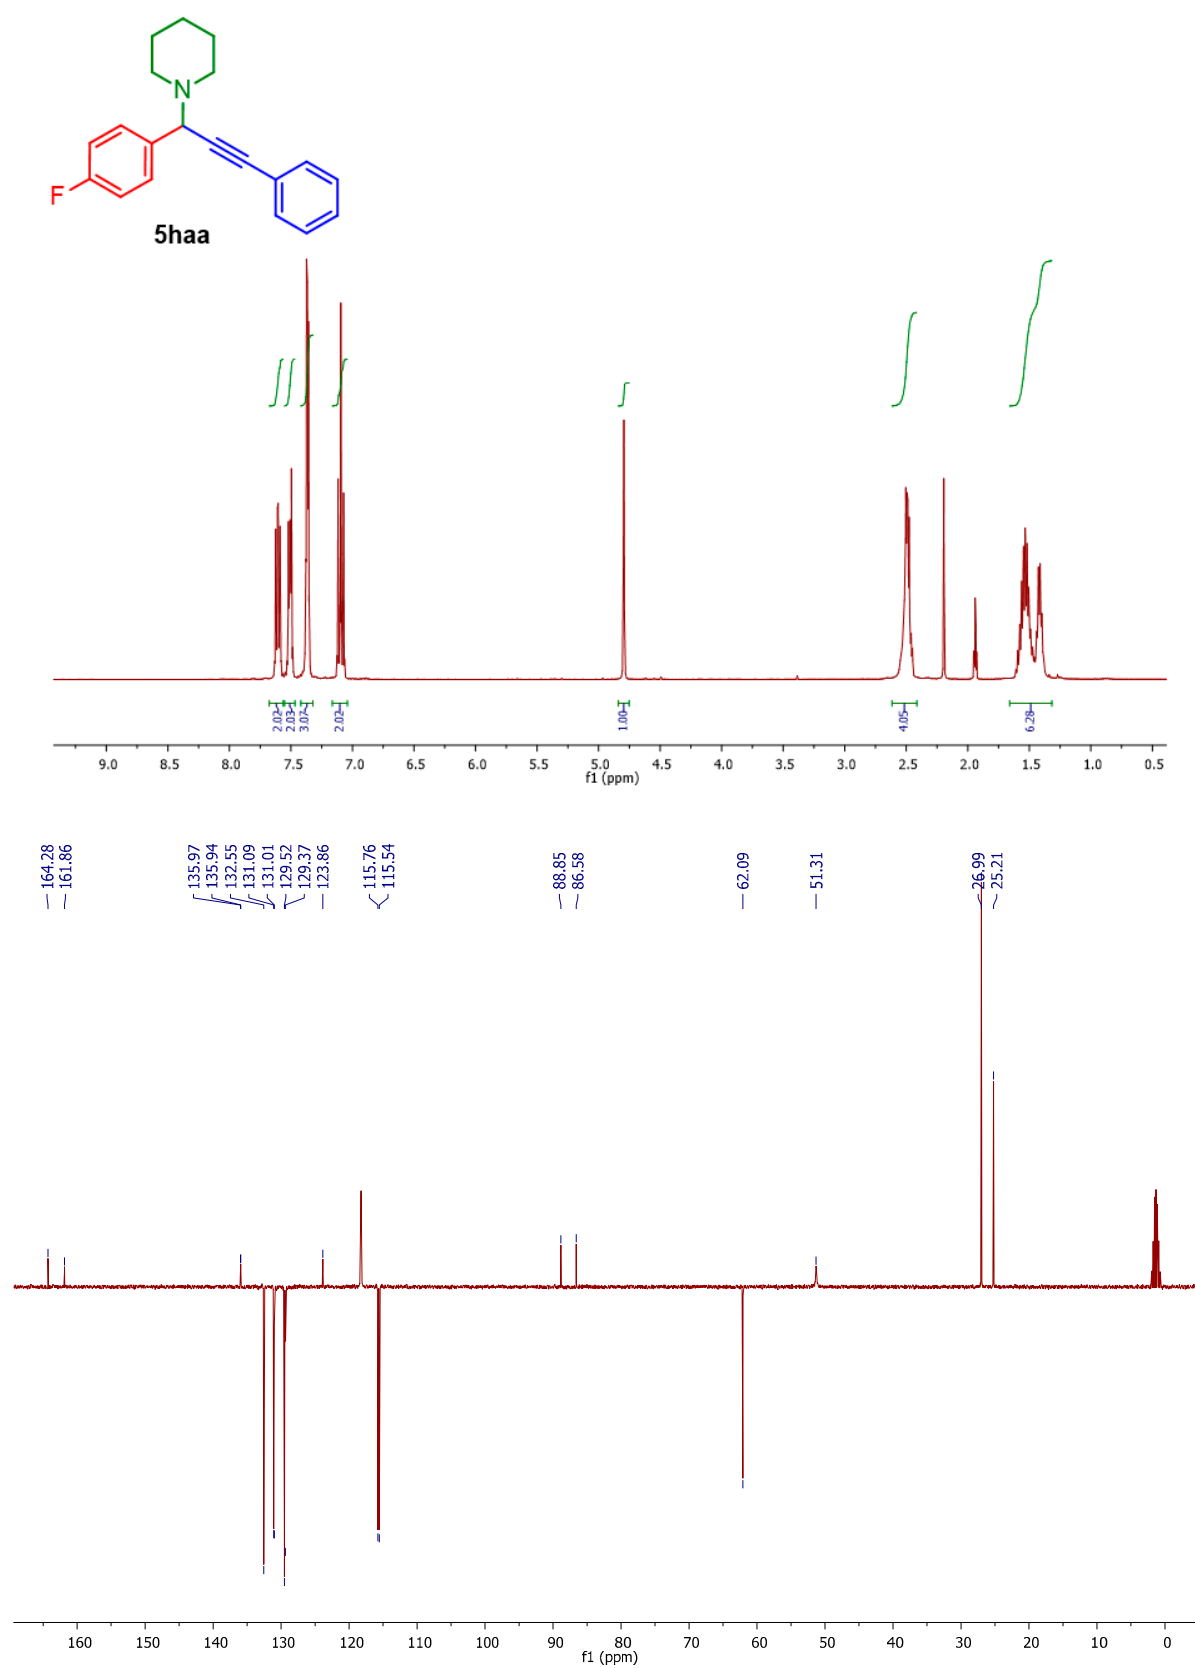

**Figure S8.** <sup>1</sup>H and <sup>13</sup>C-APT (CD<sub>3</sub>CN) NMR spectra of 1-(1-(4-fluorophenyl)-3-phenylprop-2-ynyl)piperidine (**5haa**).

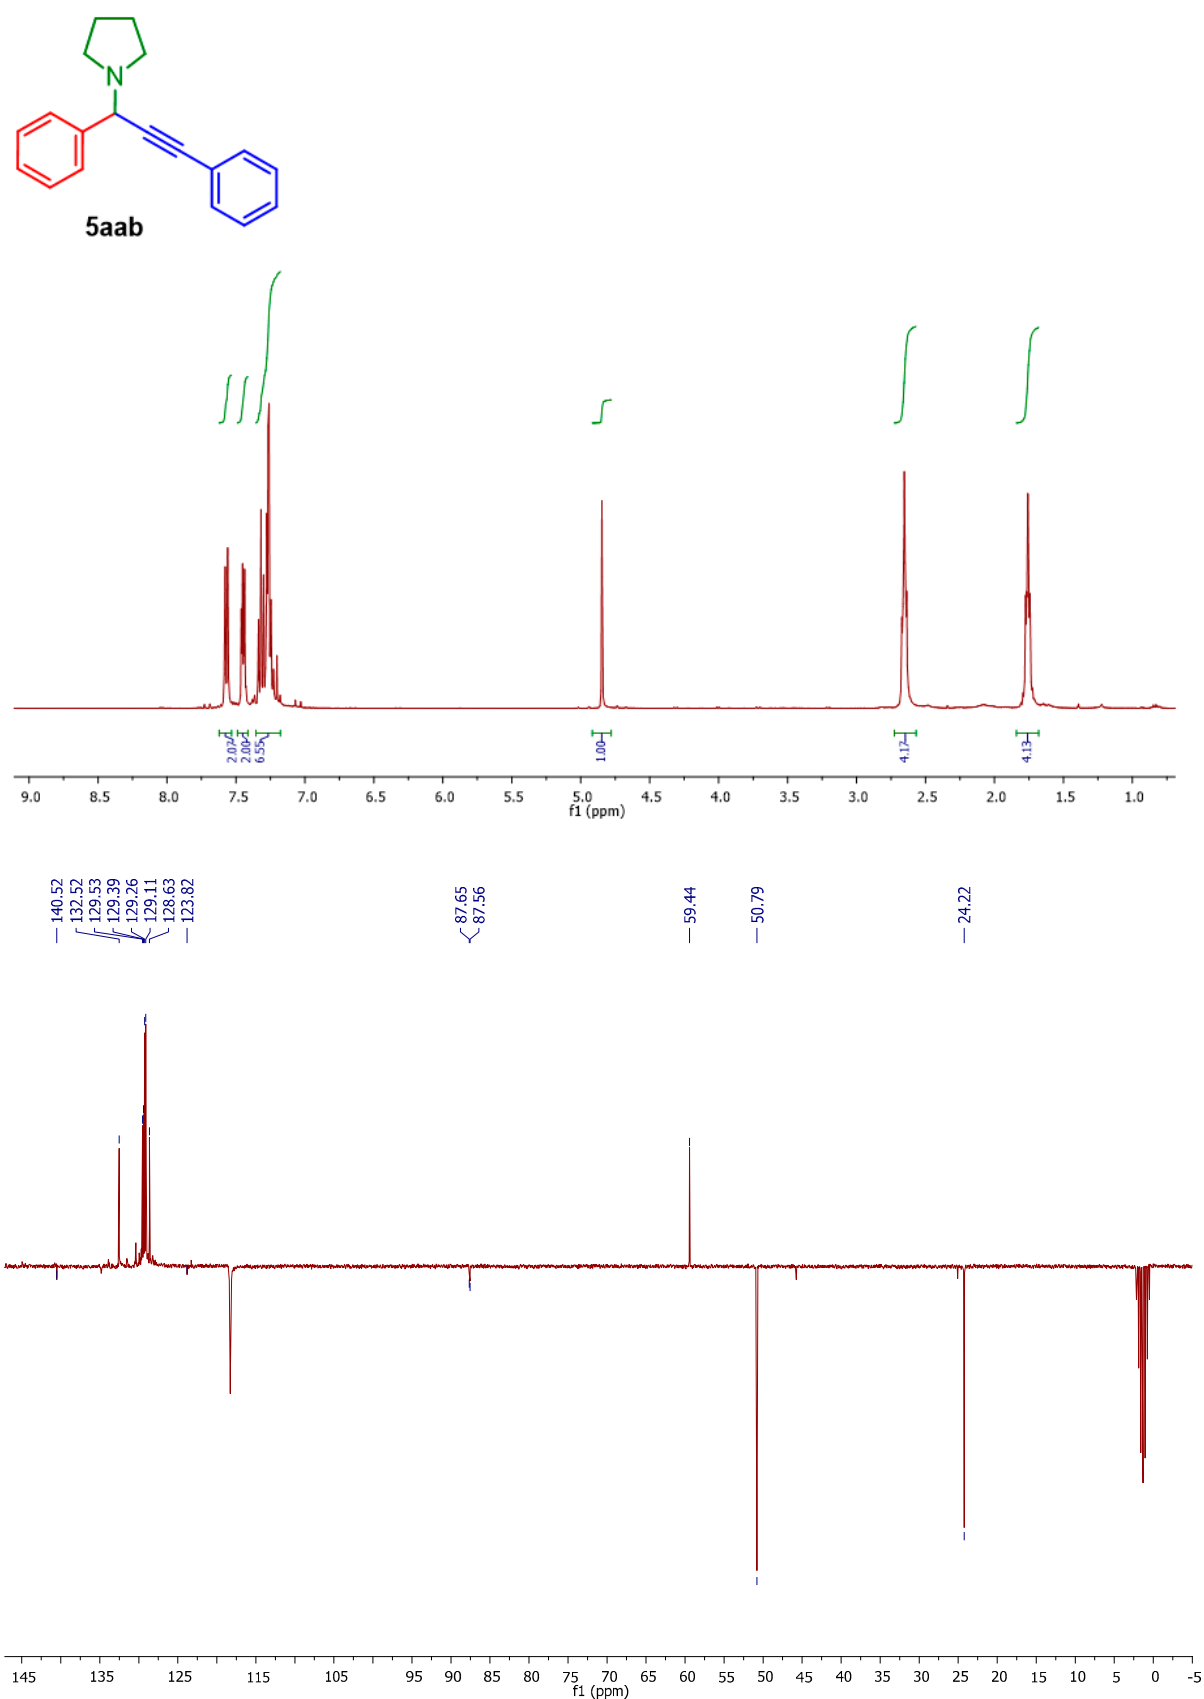

**Figure S9.**  $^1\text{H}$  ( $\text{CDCl}_3$ ) and  $^{13}\text{C}$ -APT ( $\text{CD}_3\text{CN}$ ) NMR spectra of 1-(1,3-diphenylprop-2-ynyl)pyrrolidine (**5aab**).

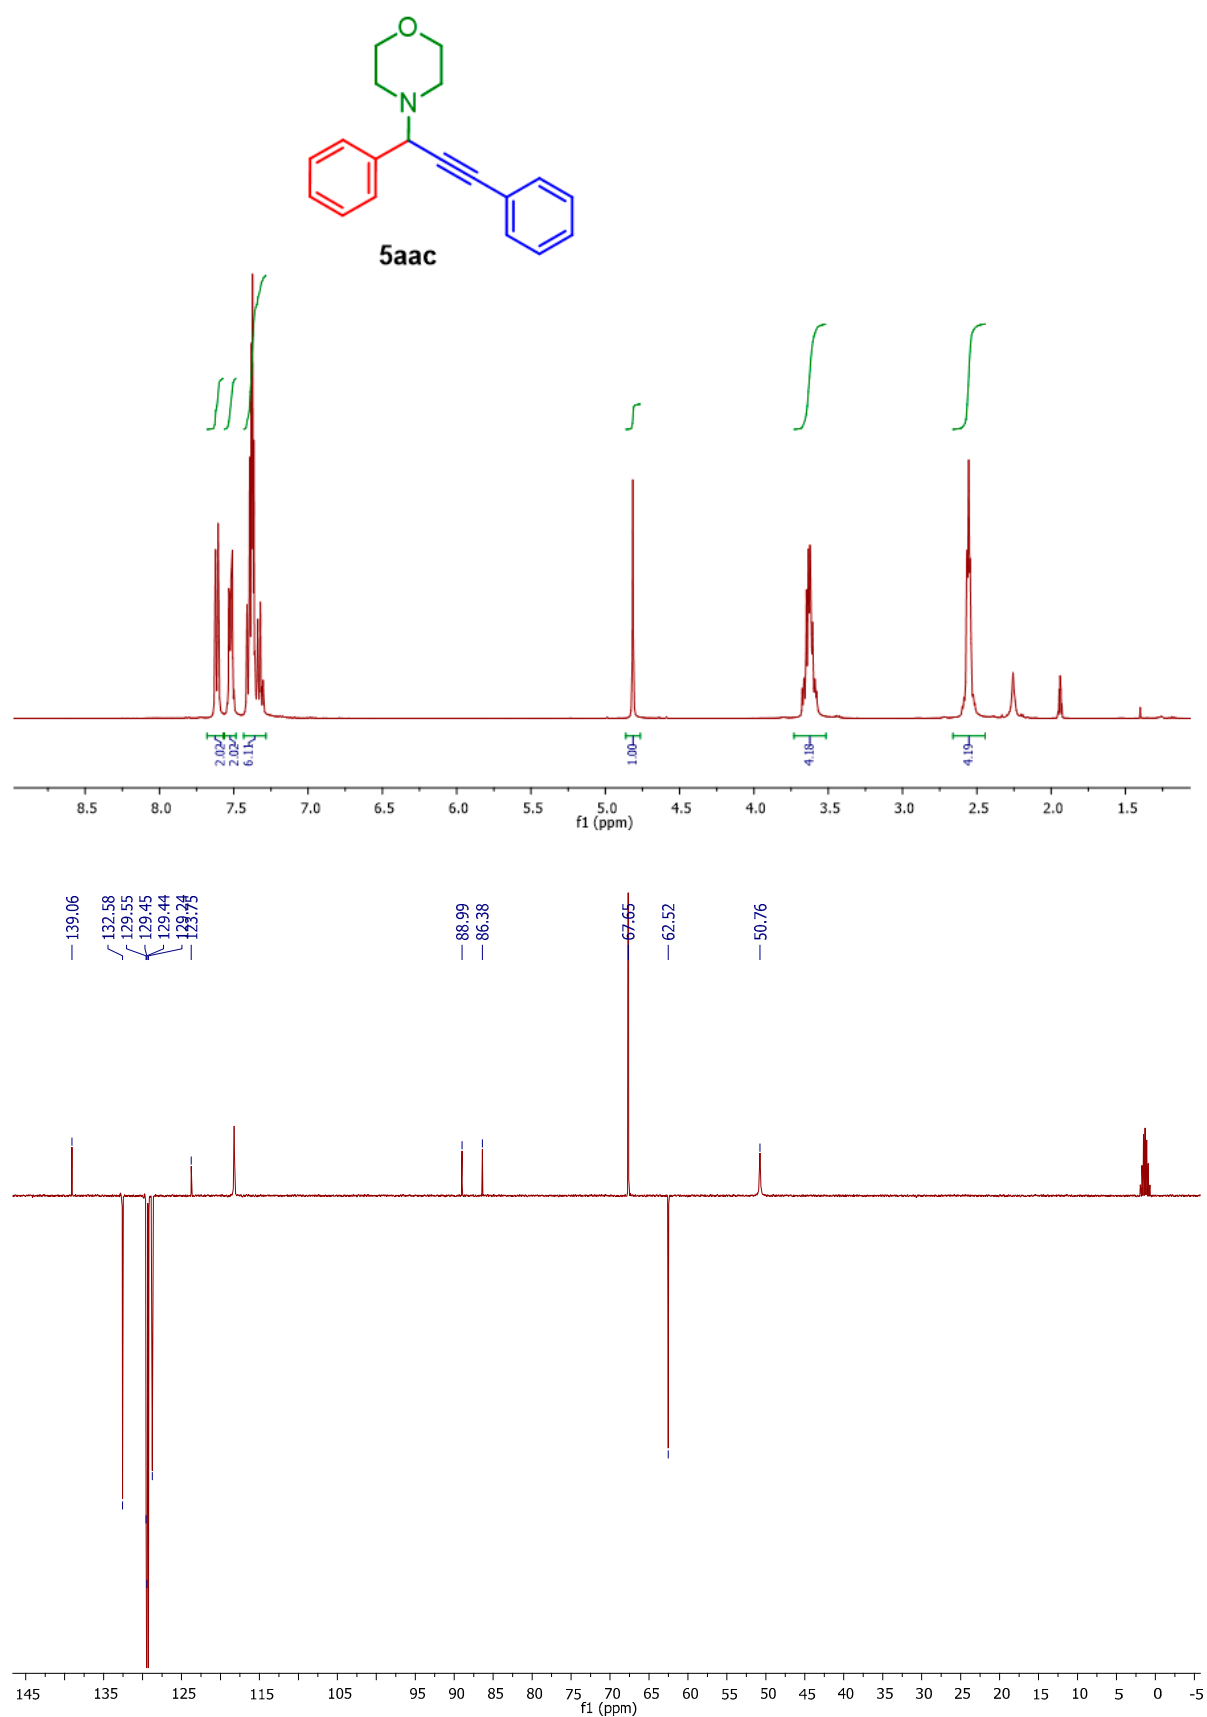

**Figure S10.** <sup>1</sup>H and <sup>13</sup>C-APT (CD<sub>3</sub>CN) NMR spectra of 4-(1,3-diphenylprop-2-ynyl)morpholine (**5aac**).

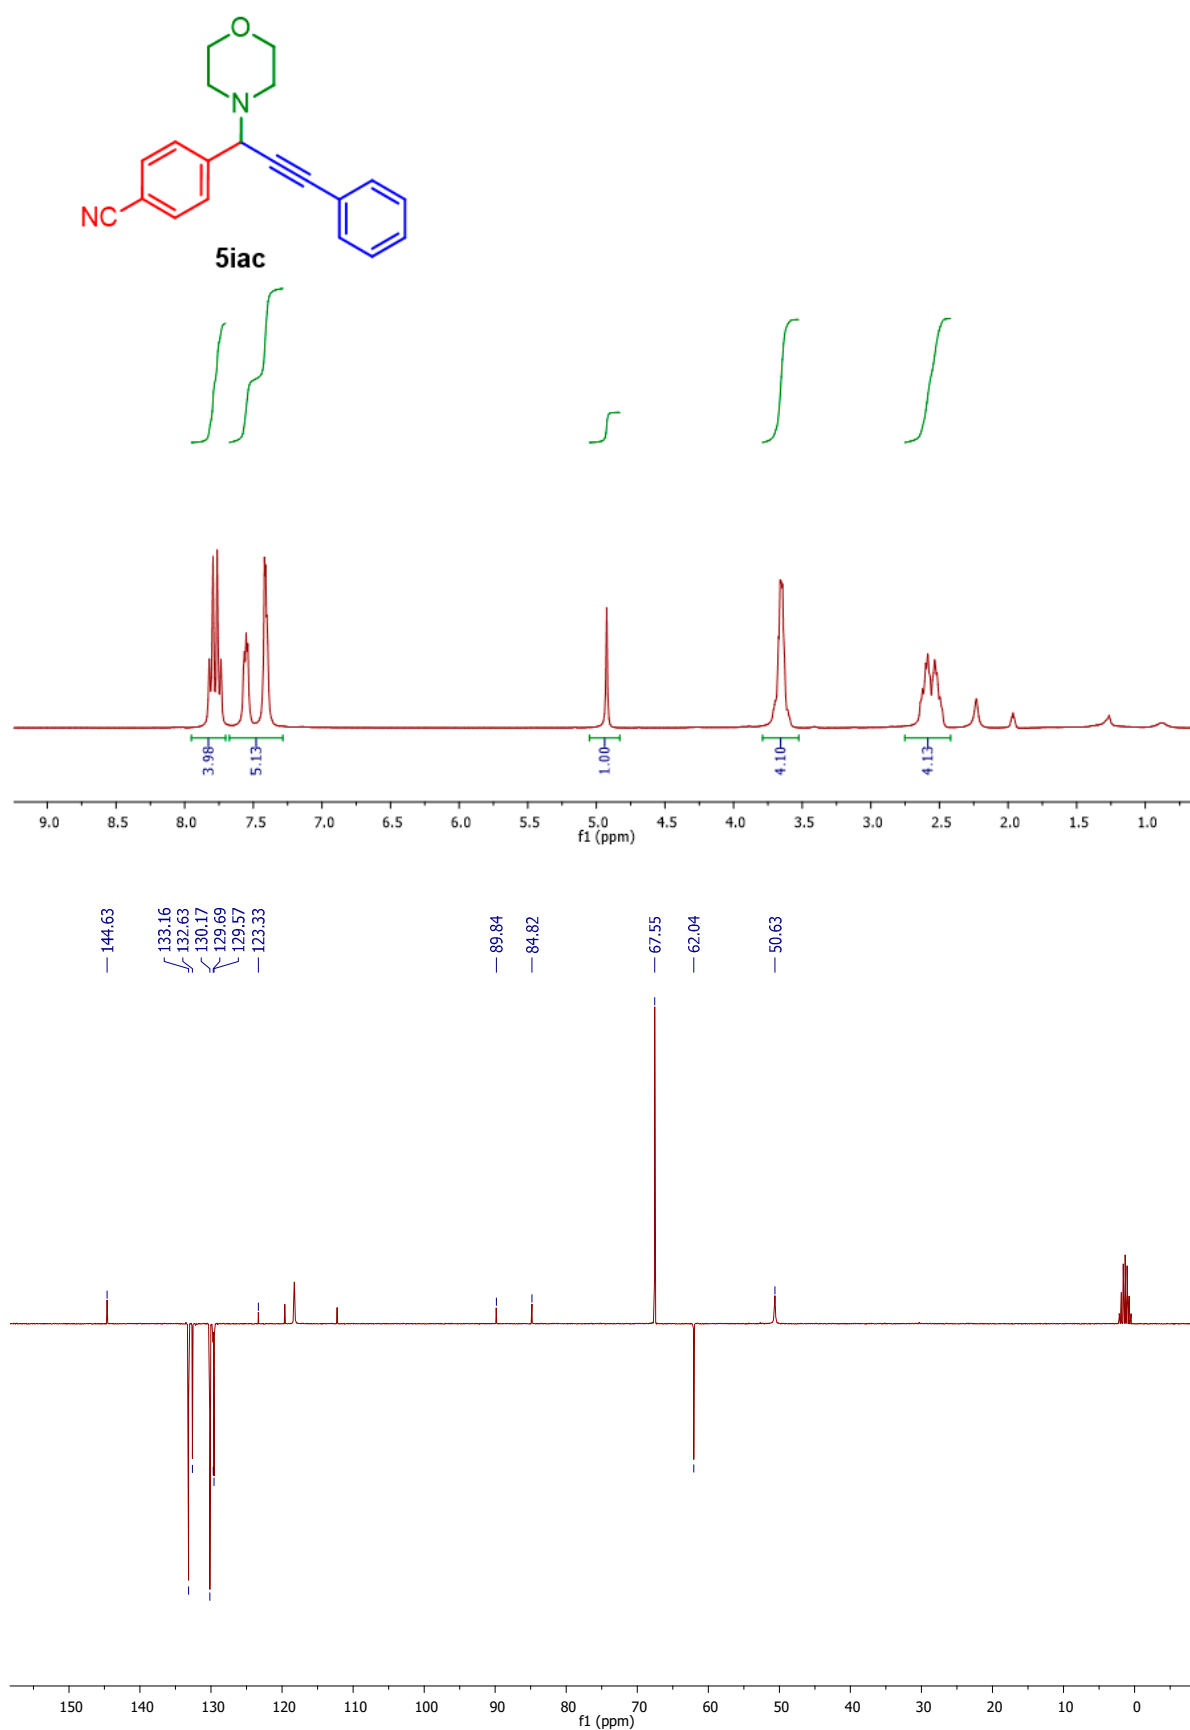

**Figure S11.** <sup>1</sup>H and <sup>13</sup>C-APT (CD<sub>3</sub>CN) NMR spectra of 4-(1-morpholino-3-phenylprop-2-yn-1-yl)benzonitrile (**5iac**).

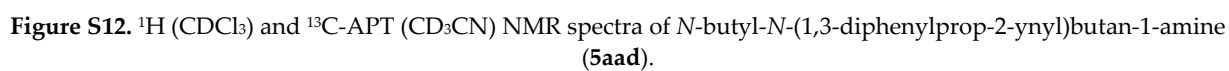

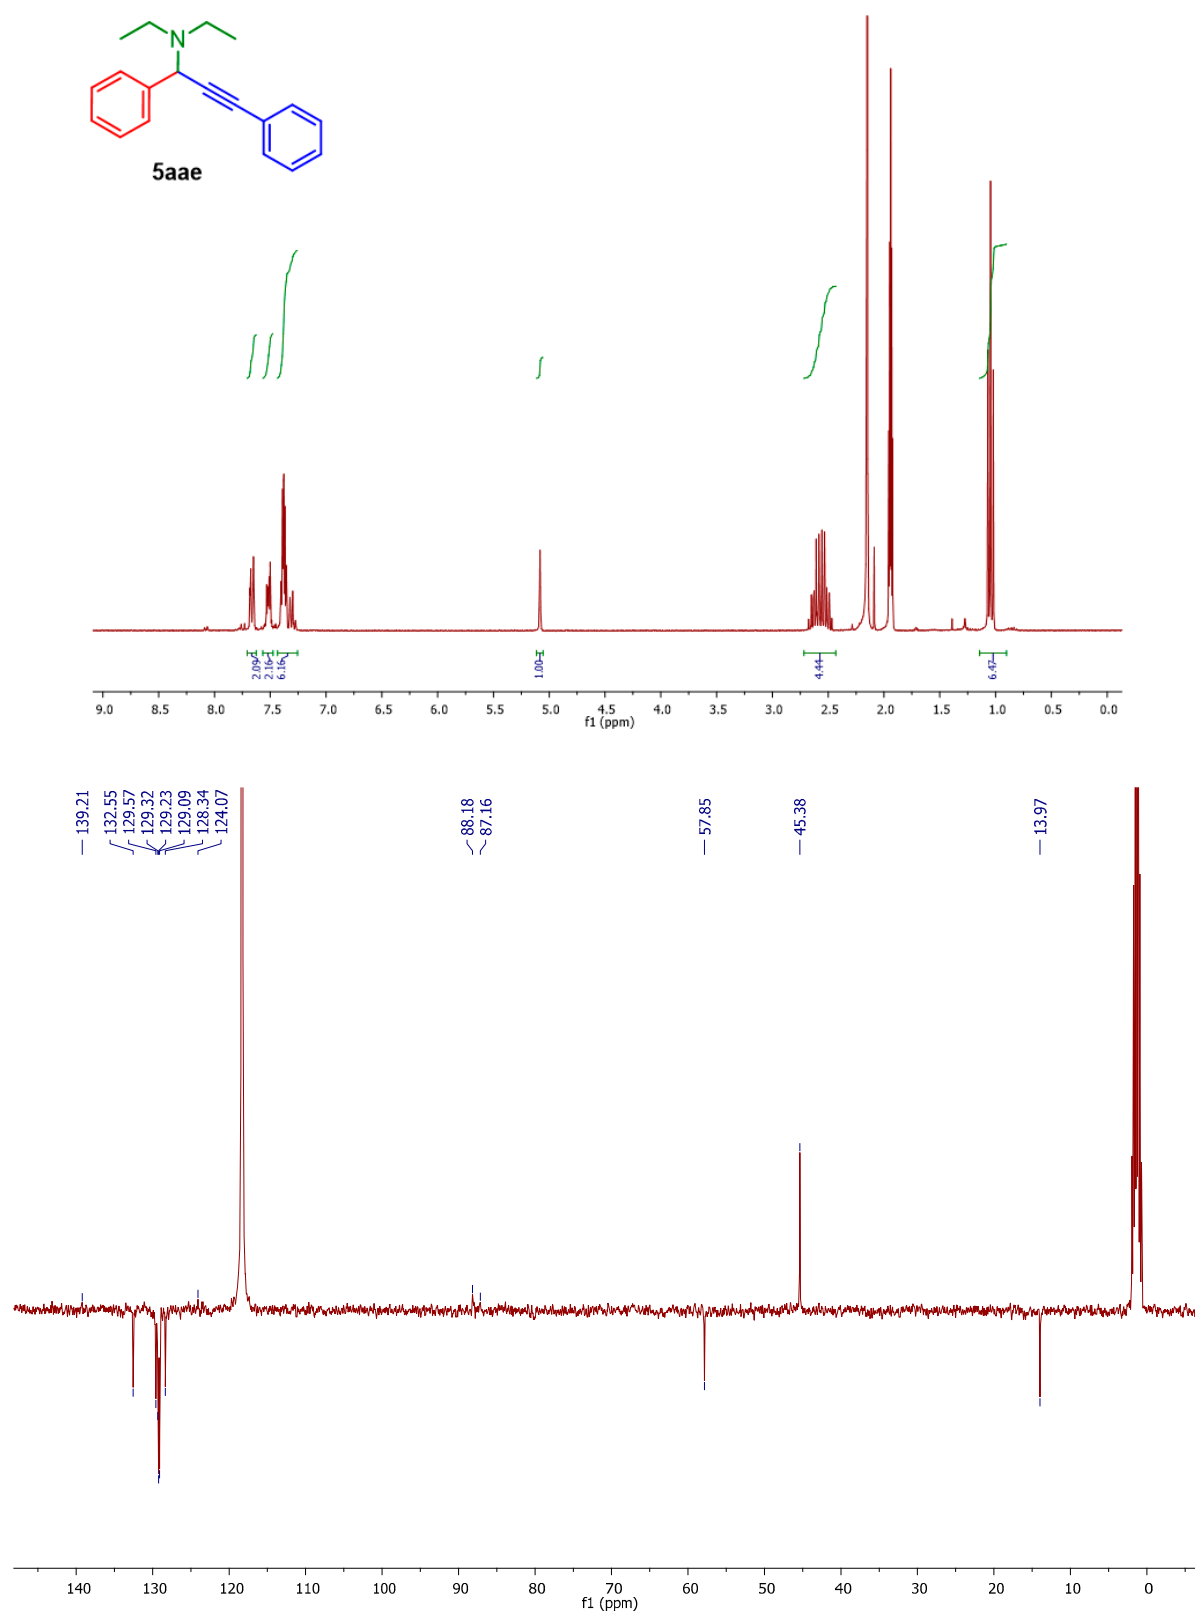

**Figure S13.** <sup>1</sup>H and <sup>13</sup>C-APT (CD<sub>3</sub>CN) NMR spectra of *N,N*-diethyl-1,3-diphenylprop-2-yn-1-amine (**5aae**).

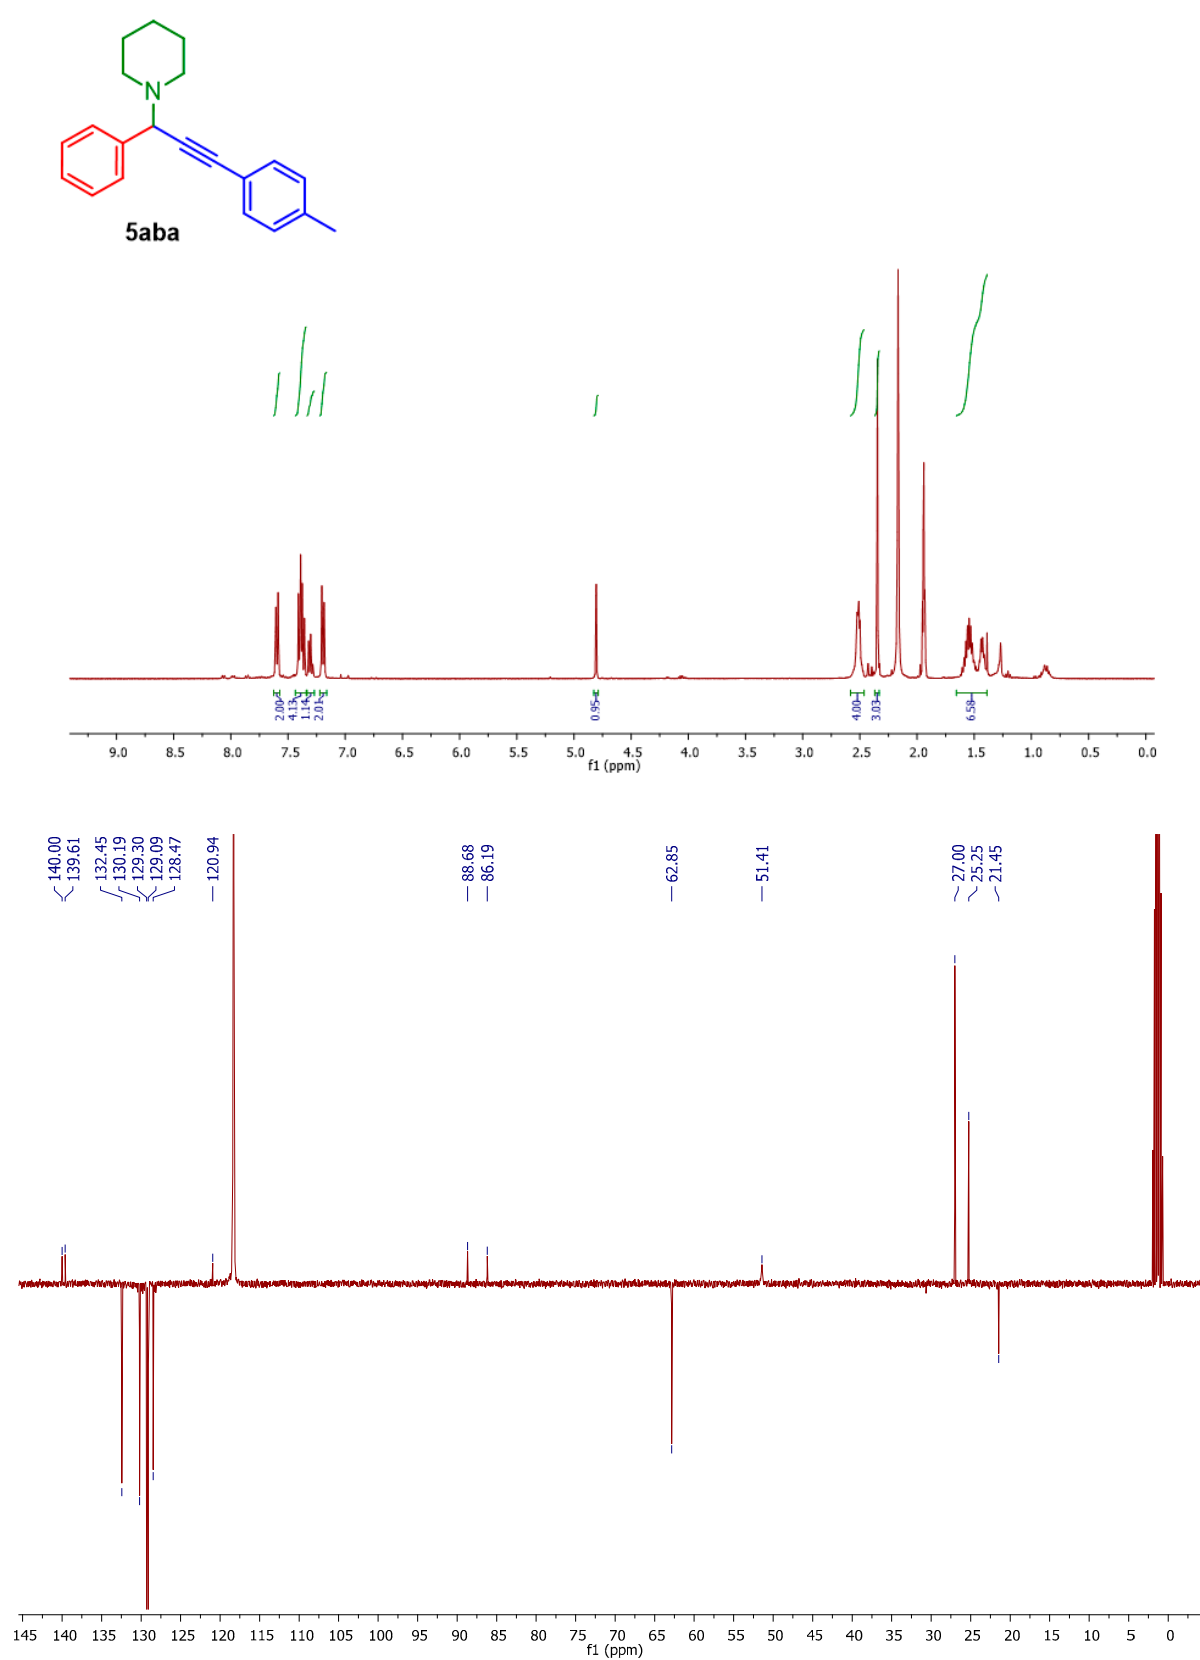

**Figure S14.** <sup>1</sup>H and <sup>13</sup>C-APT (CD<sub>3</sub>CN) NMR spectra of 1-(1-phenyl-3-p-tolylprop-2-ynyl)piperidine (**5aba**).

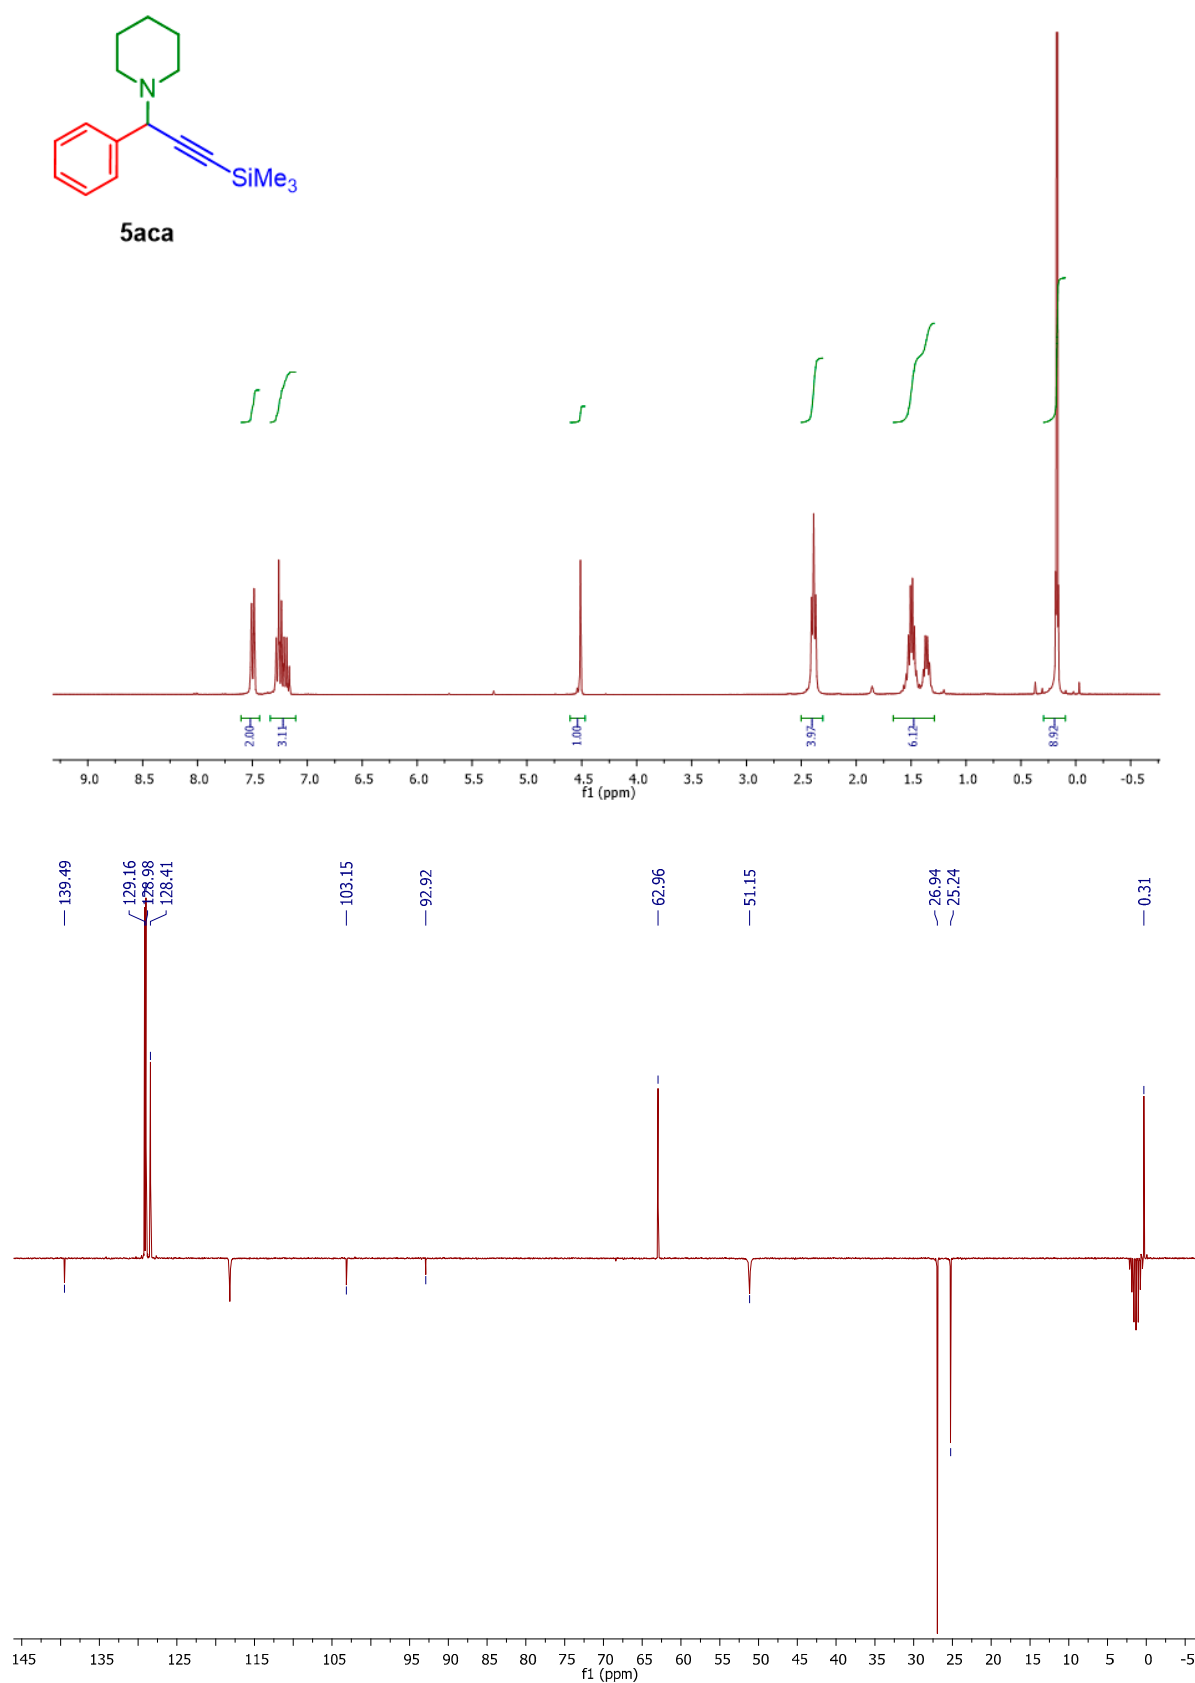

**Figure S15.** <sup>1</sup>H (CDCl<sub>3</sub>) and <sup>13</sup>C-APT (CD<sub>3</sub>CN) NMR spectra of 1-(1-phenyl-3-(trimethylsilyl)prop-2-ynyl)piperidine (**5aca**).
